# Supplementary material for: A perovskite solar cell textile that works at −40 to 160 °C
Source: Royal Society of Chemistry journal article supplement (doi:10.1039/c9ta13785h), 2020-01-01
Supplement: c9ta13785h1.pdf [file c9ta13785h1.pdf]

## Supplementary Information

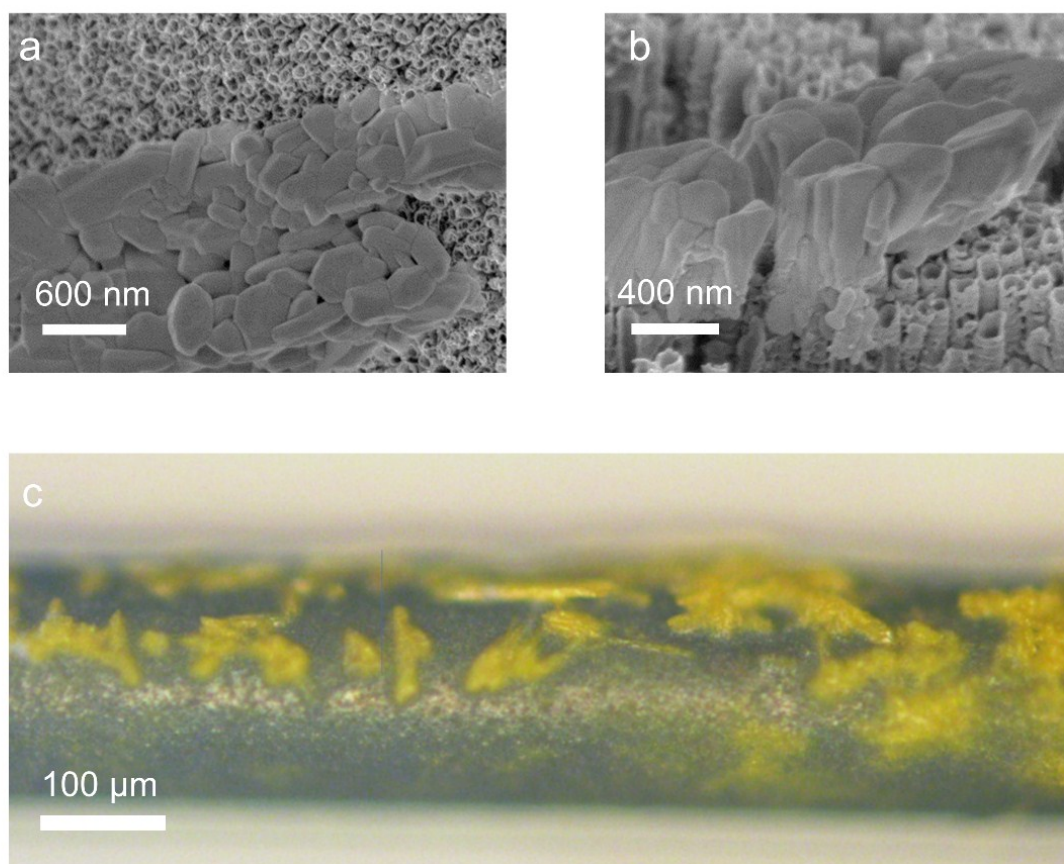

**Fig. S1** (a) and (b) Scanning electron microscopy (SEM) images of top and side views of CsPbBr<sub>3</sub> on TiO<sub>2</sub> modified Ti wire using two-step solution deposition once, respectively. (c) Optical micrograph of CsPbBr<sub>3</sub> on the modified-Ti wire using two-step solution deposition for seven times.

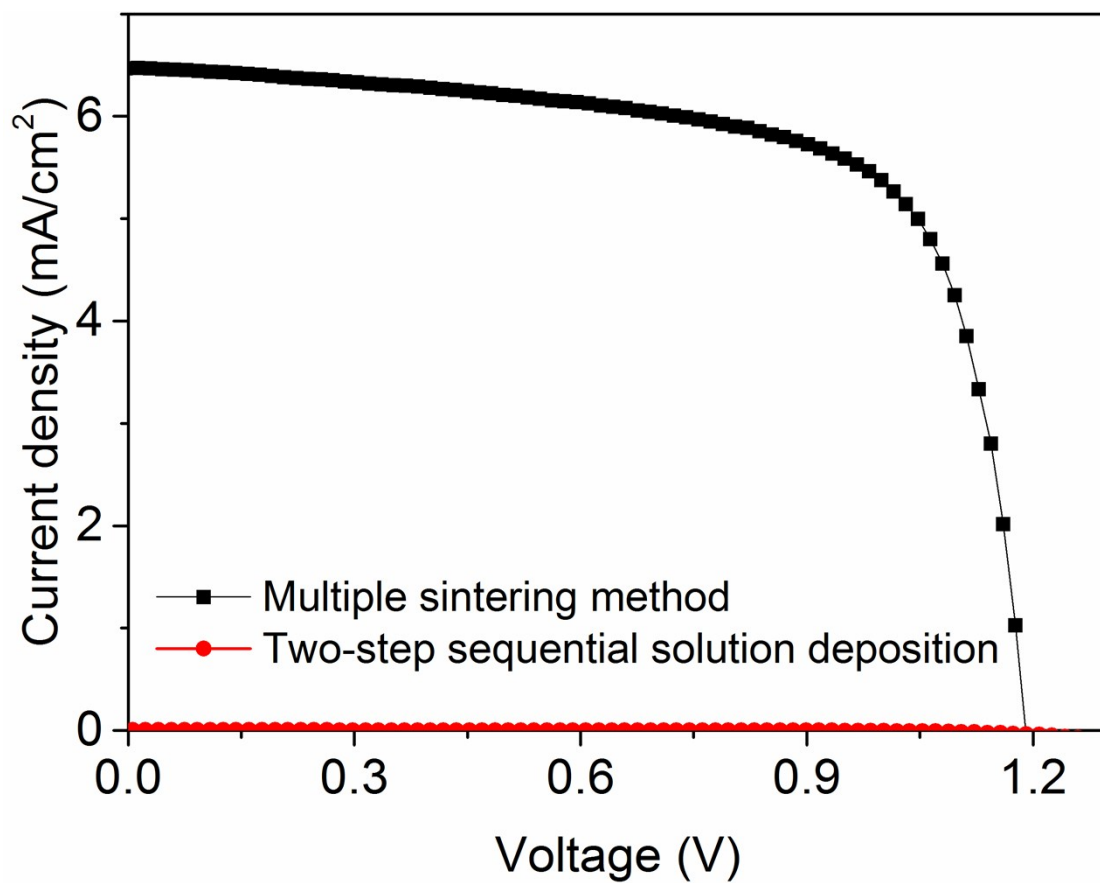

**Fig. S2** Comparison of J-V curves between multiple sintering method and typical two-step sequential solution deposition.

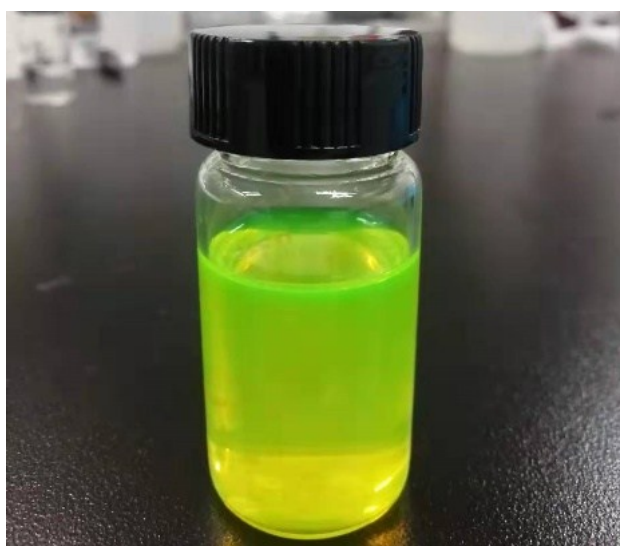

**Fig. S3** Photograph of the CsPbBr<sub>3</sub> quantum dot solution.

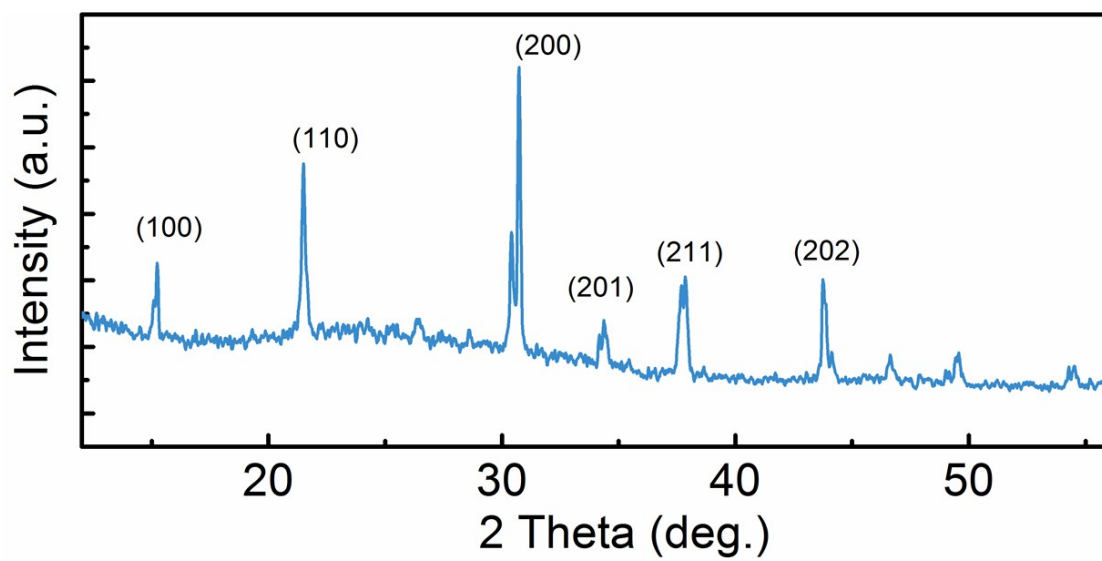

**Fig. S4** XRD pattern of CsPbBr<sub>3</sub> quantum dots.

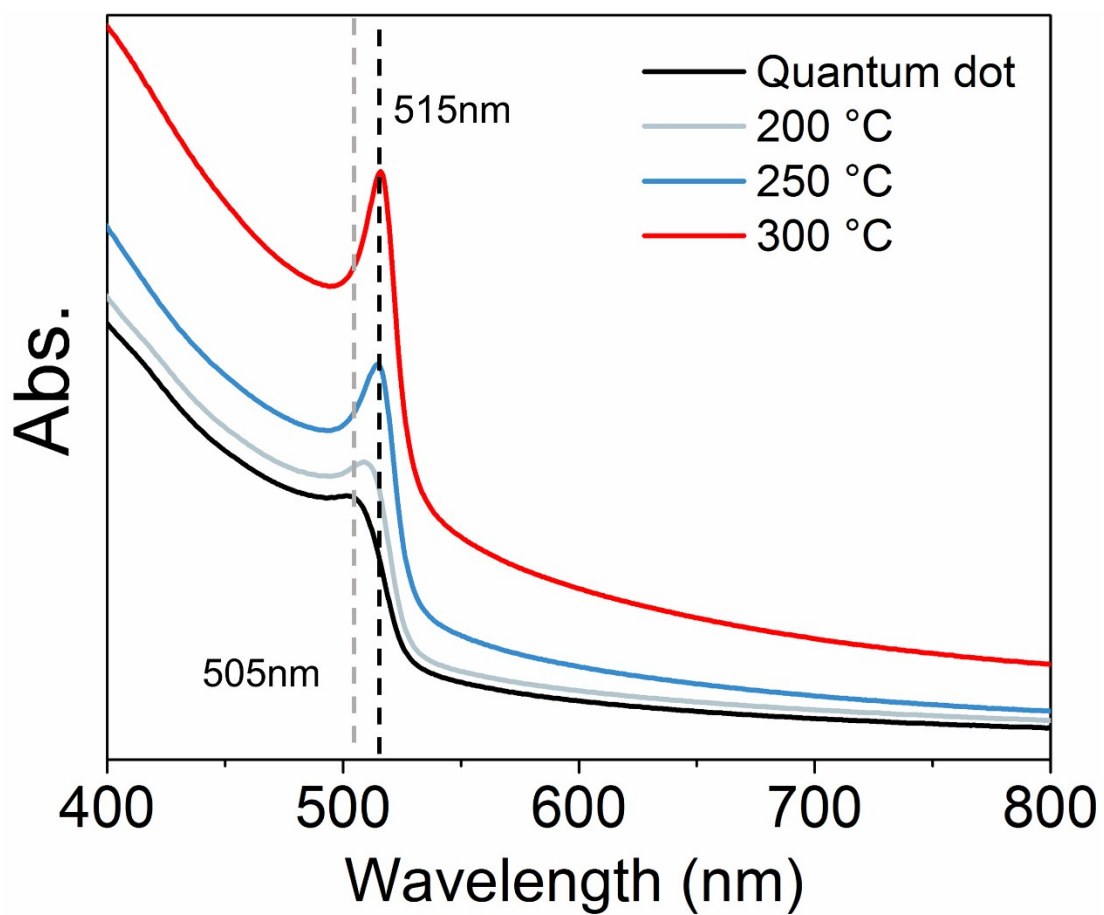

**Fig. S5** UV-vis absorption of CsPbBr<sub>3</sub> quantum dots annealed at different temperatures.

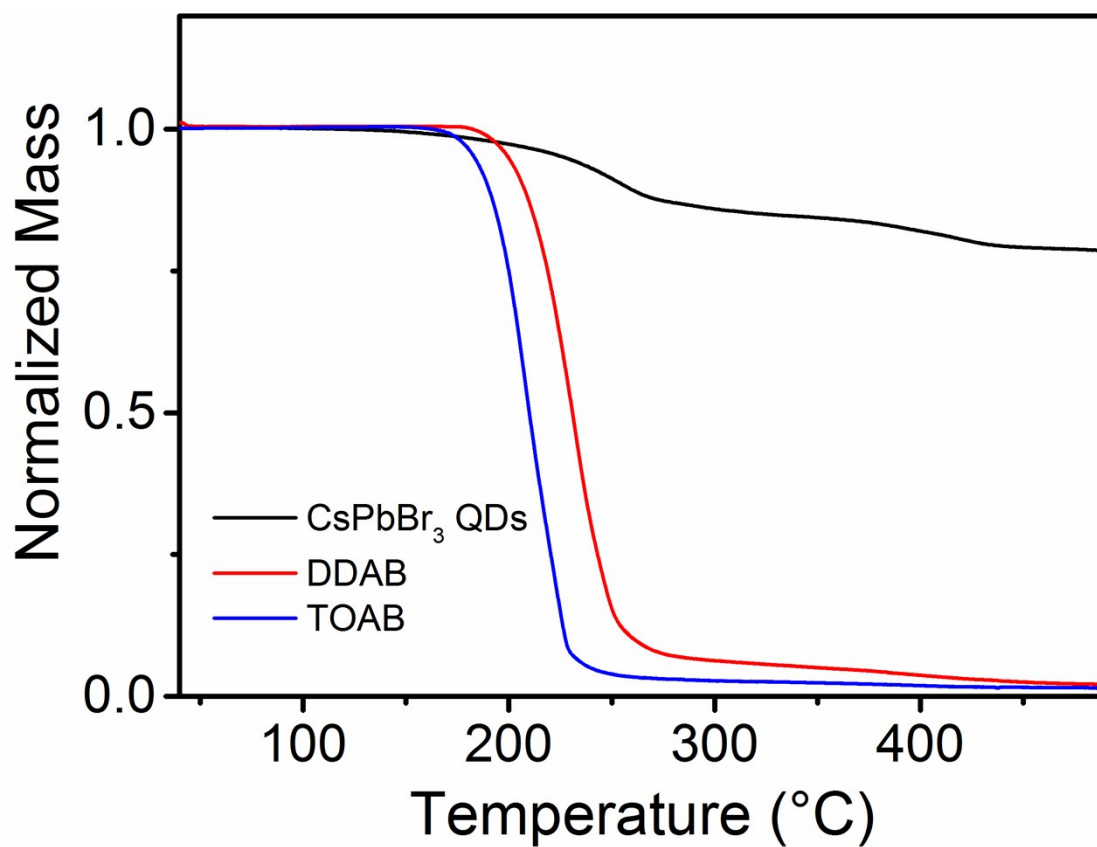

**Fig. S6** TGA curves at a scan rate of 10 °C/min in air for CsPbBr<sub>3</sub> quantum dots after solvent removal, DDAB, and TOAB.

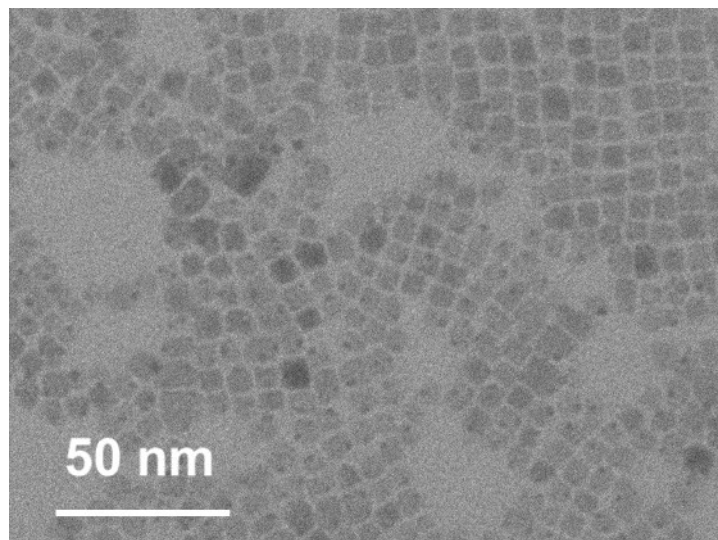

**Fig. S7** Transmission electron microscope (TEM) image of typical CsPbBr<sub>3</sub> quantum dots.

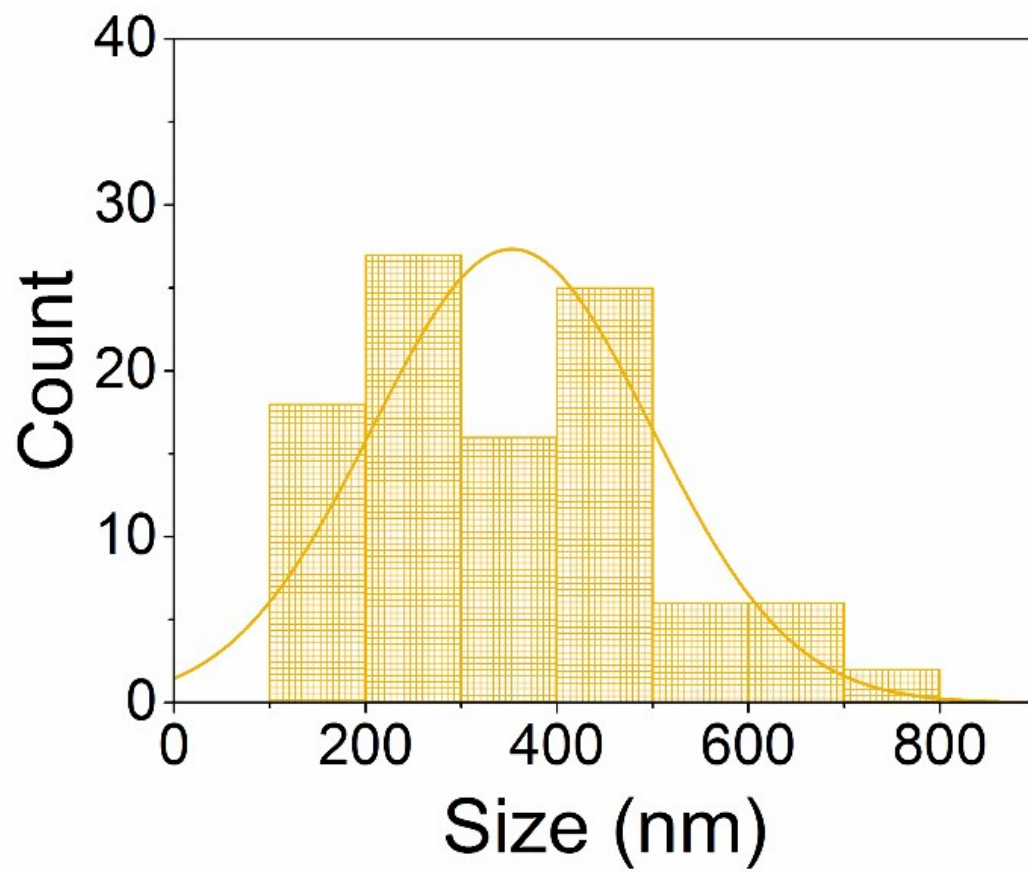

Fig. S8 The grain size distribution of CsPbBr<sub>3</sub>.



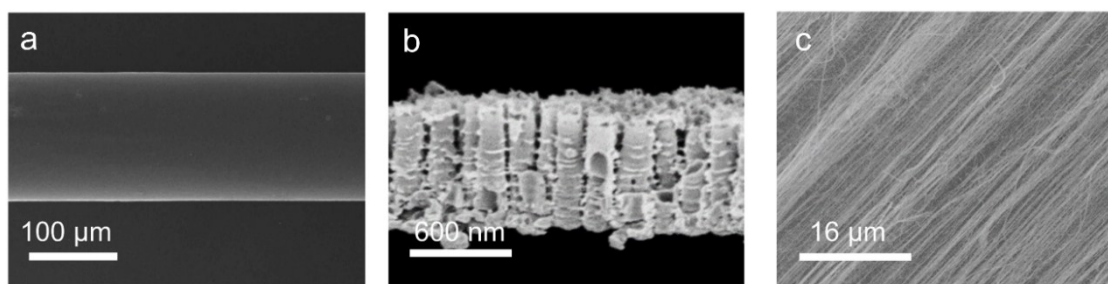

**Fig. S9** SEM images of Ti wire (a), TiO<sub>2</sub> nanotubes (b), and CNT sheet (c).

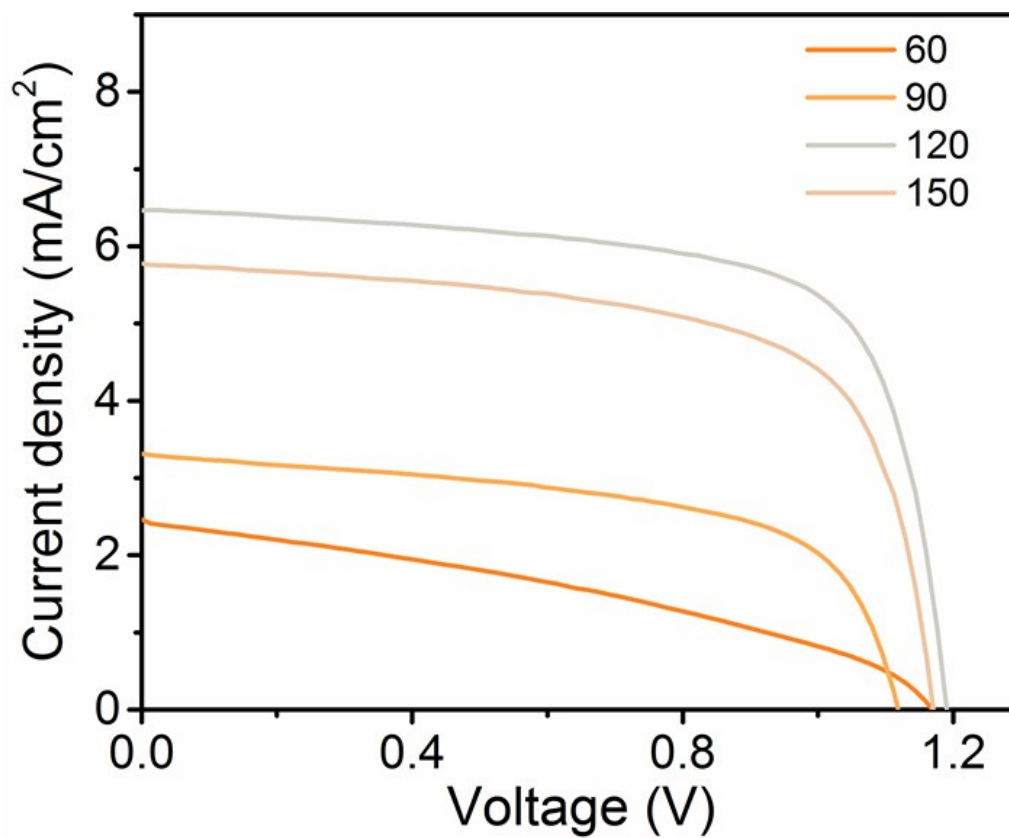

**Fig. S10** J–V curves of fiber-shaped perovskite solar cells with increasing coating numbers of CsPbBr<sub>3</sub> quantum dots.

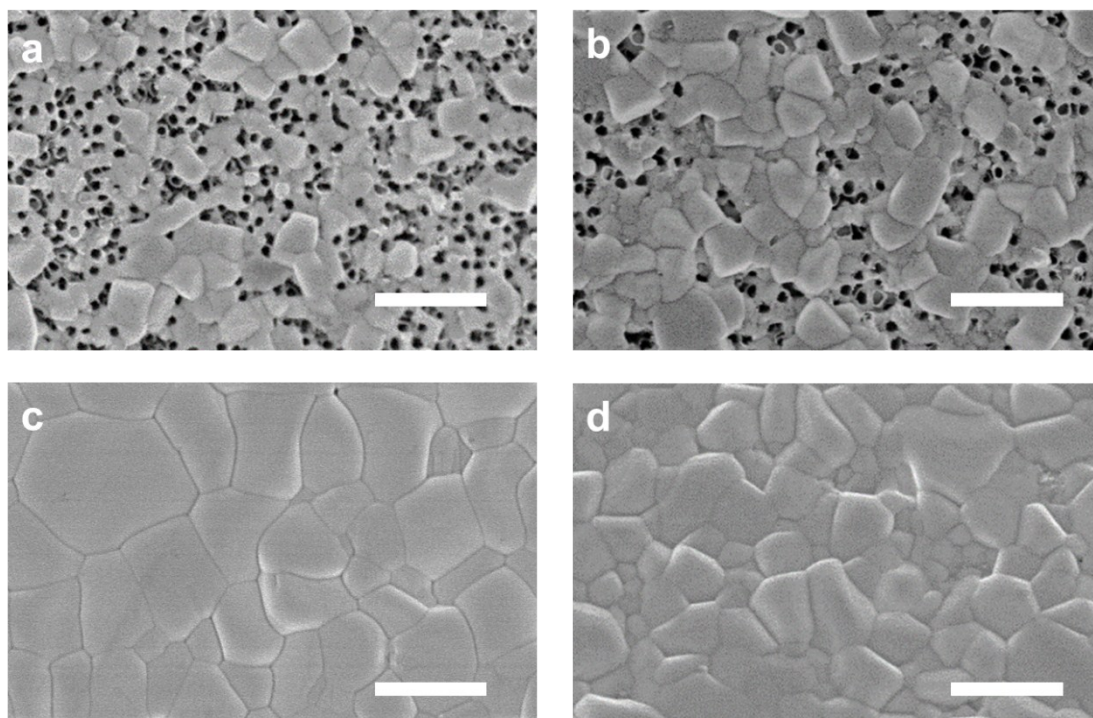

**Fig. S11** SEM images of CsPbBr<sub>3</sub> layers at increasing coating times. (a) 60, (b) 90, (c) 120, (d) 150. Scale bar, 800 nm.

**Table S1.** Photovoltaic parameters of fiber-shaped perovskite solar cells with increasing coating numbers of CsPbBr<sub>3</sub> quantum dots.

| <b>Coating number</b> | <b>Voc (V)</b> | <b>Jsc (mA/cm<sup>2</sup>)</b> | <b>FF</b> | <b>PCE (%)</b> |
|-----------------------|----------------|--------------------------------|-----------|----------------|
| 60                    | 1.16           | 2.43                           | 0.37      | 1.04           |
| 90                    | 1.13           | 5.21                           | 0.59      | 3.46           |
| 120                   | 1.19           | 6.48                           | 0.70      | 5.37           |
| 150                   | 1.17           | 5.78                           | 0.66      | 4.44           |

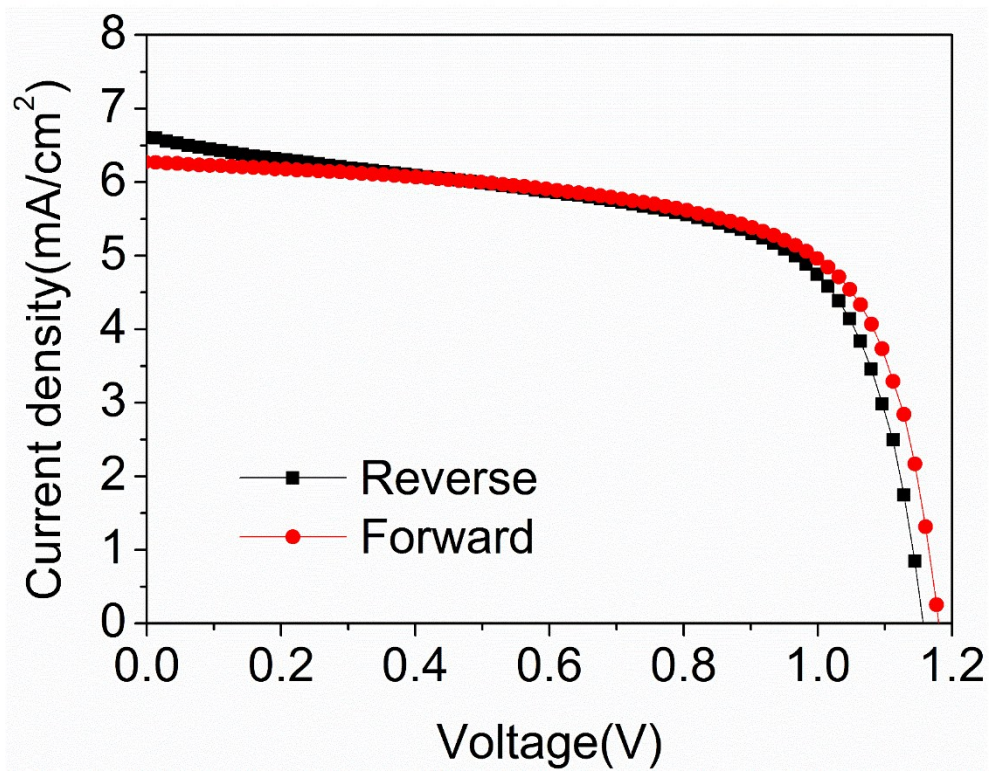

**Fig. S12** J–V curves scanned in different voltage sweep directions.

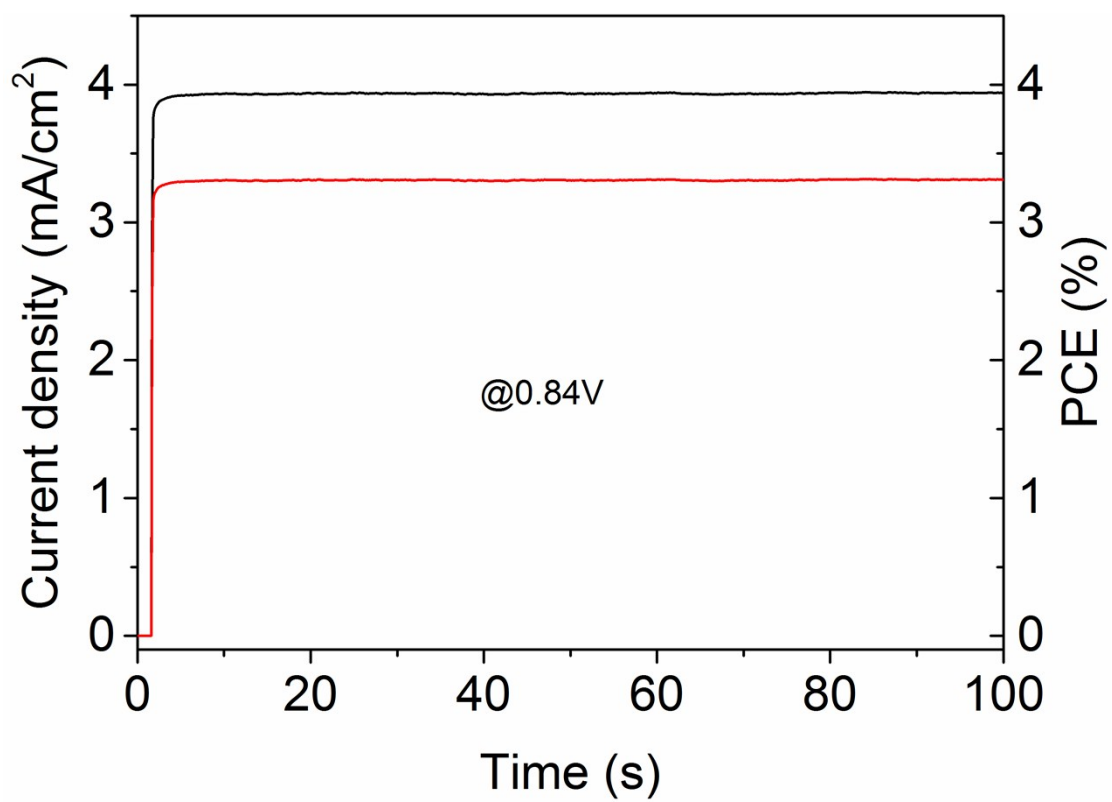

**Fig. S13** Stabilized photocurrent measurement and power output at -20 °C.

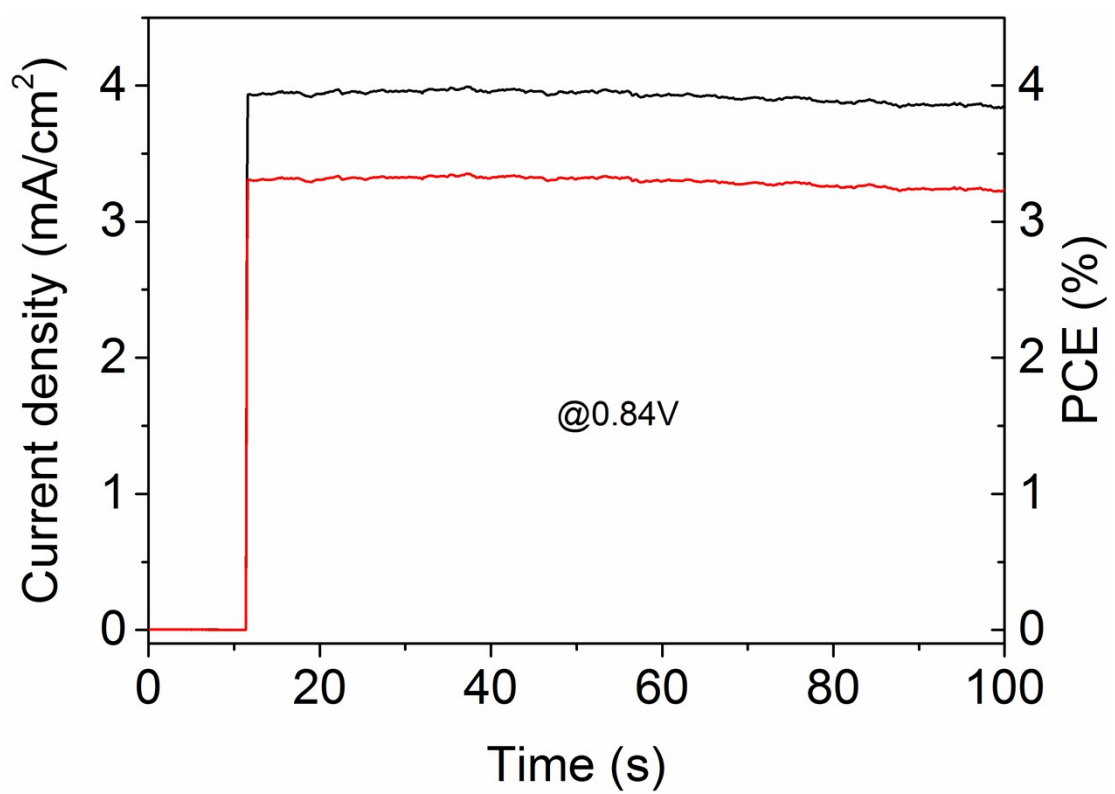

**Fig. S14** Stabilized photocurrent measurement and power output at 100 °C.

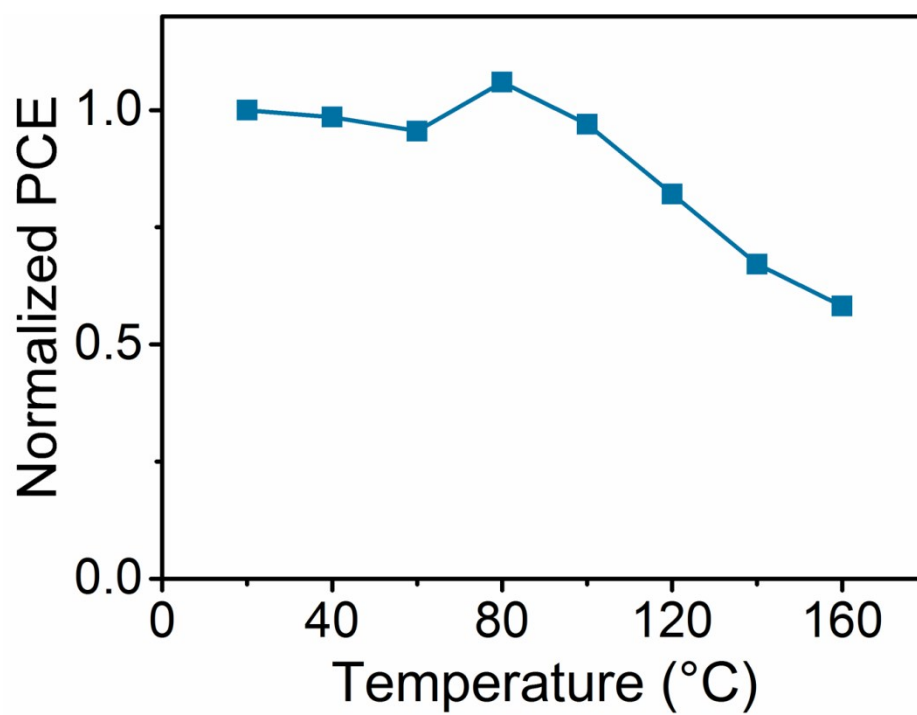

**Fig. S15** Dependence of power conversion efficiency on temperature for the fiber-shaped solar cell with compact TiO<sub>2</sub> layer.
